# Supplementary material for: Strong evidence against platelet-rich plasma injections for chronic lateral epicondylar tendinopathy: a systematic review
Source: HighWire-hosted journal article supplement (doi:10.1136/bjsports-2013-093281), 2014-02-21
Supplement: bjsports-2013-093281supp_table3.pdf [file bjsports-2013-093281supp_table3.pdf]

**Supplementary table 3 – Characteristics of included studies**

| Reference                                    | Number of participants | Population characteristics                                                                                                       | Intervention                                                                                                        | Control group(s)                                                                                                            | Additional treatments                                                                                 | Primary outcome measure                                                                                         | Duration of follow-up (months) | Primary outcome in intervention group (% improvement)                                                                                                                                                                                                                                                                                | Primary outcome in control group(s) (% improvement)                                                                                                                                                                                                                                                                   |
|----------------------------------------------|------------------------|----------------------------------------------------------------------------------------------------------------------------------|---------------------------------------------------------------------------------------------------------------------|-----------------------------------------------------------------------------------------------------------------------------|-------------------------------------------------------------------------------------------------------|-----------------------------------------------------------------------------------------------------------------|--------------------------------|--------------------------------------------------------------------------------------------------------------------------------------------------------------------------------------------------------------------------------------------------------------------------------------------------------------------------------------|-----------------------------------------------------------------------------------------------------------------------------------------------------------------------------------------------------------------------------------------------------------------------------------------------------------------------|
| Peerbooms et al. 2010 and Gosens et al. 2011 | 100                    | Clinical diagnosis of lateral epicondylar tendinopathy. Symptoms > 6 months. VAS for pain ≥ 50 points. Mean patient age 47 years | Single injection with 3 ml PRP and with 2 ml bupivacaine and epinephrine. Peppering technique. No activation of PRP | Single injection with 5 ml corticosteroids (kenacort 40 mg/ml triamcinolon acetonide) and with bupivacaine and epinephrine. | Standardized stretching protocol for 2 weeks. Eccentric strengthening program initiated after 2 weeks | 25% reduction in visual analog score or DASH score (0-100) without a re-intervention after 2 years              | 24                             | 39/51 (75%) treatment success according to pre-defined improvement VAS score*<br><br>37/51 (73%) treatment success according to pre-defined improvement DASH score*                                                                                                                                                                  | 21/49 (43%) treatment success according to pre-defined improvement VAS score.<br><br>19/49 (39%) treatment success according to pre-defined improvement DASH score.                                                                                                                                                   |
| Thanasas et al. 2011                         | 28                     | Clinical diagnosis of lateral epicondylar tendinopathy. Symptoms ≥ 3 months. VAS for pain 50 points. Mean patient age 36 years   | Single injection with 3 ml PRP. Peppering technique. No activation of PRP                                           | Single injection 3 ml with autologous peripheral whole blood                                                                | Simple program of stretching and eccentric loading exercises, twice daily for 5 weeks                 | Not explicited. VAS score (0-10) and Liverpool elbow score (0-10) were recorded at baseline, 6, 12 and 24 weeks | 6                              | 6 weeks: mean VAS improvement 3.8 points (61%).*<br>Mean Liverpool score improvement 2.0 points (29%)†<br><br>12 weeks: mean VAS improvement 4.2 points (69%).†<br>Mean Liverpool score improvement 2.2 points (31%)†<br><br>24 weeks: mean VAS improvement 4.4 points (71%).†<br>Mean Liverpool score improvement 2.3 points (33%)† | 6 weeks: mean VAS improvement 2.5 points (42%). Mean Liverpool score improvement 1.9 points (25%)<br><br>12 weeks: mean VAS improvement 3.2 points (54%). Mean Liverpool score improvement 1.9 points (26%)<br><br>24 weeks: mean VAS improvement 3.4 points (58%). Mean Liverpool score improvement 2.0 points (27%) |
| Creaney et al. 2011                          | 150                    | Elbow tendinopathy patients (criteria not mentioned) who had failed conservative physical therapy. Symptoms ≥ 6 months. Mean     | Two injections with 1.5 ml PRP and with 2 ml bupivacaine (interval 1 month). No peppering                           | Two injections with autologous peripheral whole blood (amount not mentioned) with 2 ml bupivacaine (interval 1 month)       | Not mentioned                                                                                         | 25 points improvement on PRTEE score (0-100)                                                                    | 6                              | 46/70 (66%) treatment success according to pre-defined improvement PRTEE score†                                                                                                                                                                                                                                                      | 43/60 (72%) treatment success according to pre-defined improvement PRTEE score                                                                                                                                                                                                                                        |

|                    |     |                                                                                                                                                                                |                                                                                                                             |                                                                                                                                                                                                      |                                                           |                                                                                               |     |                                                                                           |                                                                                                                               |
|--------------------|-----|--------------------------------------------------------------------------------------------------------------------------------------------------------------------------------|-----------------------------------------------------------------------------------------------------------------------------|------------------------------------------------------------------------------------------------------------------------------------------------------------------------------------------------------|-----------------------------------------------------------|-----------------------------------------------------------------------------------------------|-----|-------------------------------------------------------------------------------------------|-------------------------------------------------------------------------------------------------------------------------------|
|                    |     | patient age 51 years                                                                                                                                                           | technique. No activation of PRP                                                                                             |                                                                                                                                                                                                      |                                                           |                                                                                               |     |                                                                                           |                                                                                                                               |
| Omar et al. 2012   | 30  | Clinical diagnosis of lateral epicondylar tendinopathy. Mean patient age 38 years                                                                                              | Single injection with unknown amount of PRP. No peppering technique or activation of PRP described                          | Single injection with unknown amount of corticosteroids                                                                                                                                              | Not mentioned                                             | Not explicated. VAS score (0-10) and DASH score (0-100) were recorded at baseline and 6 weeks | 1,5 | Mean VAS improvement 4.2 points (53%). †<br>Mean DASH score improvement 39 points (66%) † | Mean VAS improvement 4.3 points (50%). Mean DASH score improvement 37 points (65%)                                            |
| Krogh et al. 2013  | 60  | Clinical diagnosis and ultrasonographical signs of lateral epicondylar tendinopathy. Symptoms > 3 months. Mean patient age 45 years                                            | Single with injection 3-3.5 ml PRP. Peppering technique. No activation of PRP mentioned                                     | C1: Glucocorticoid injection with 1 ml triamcinolon 40 mg/ml and with 2 ml lidocaine 10 mg/ml (no peppering technique used)<br>C2: Saline injection with 3 ml saline 0.9% (peppering technique used) | Standardized tennis elbow stretching and training program | Improvement on PRTEE score (0-100) after 3 months                                             | 12  | 17 points improvement on PRTEE score after 3 months (32%) †                               | C1: 14 points improvement on PRTEE score after 3 months (27%)<br>C2: 8 points improvement on PRTEE score after 3 months (16%) |
| Mishra et al. 2013 | 230 | Clinical diagnosis of lateral epicondylar tendinopathy. Unresponsive to other conservative treatment. Symptoms > 6 months. VAS for pain ≥ 50 points. Mean patient age 48 years | Single injection with 2-3 ml PRP and with bupivacaine (amount unknown). Peppering technique. No activation of PRP mentioned | Single injection with 2-3 ml bupivacaine                                                                                                                                                             | Not standardized                                          | 25% reduction in visual analog score during wrist extension after 3 months                    | 6   | 74% treatment success according to pre-defined improvement of VAS score after 3 months †  | 66% treatment success according to pre-defined improvement of VAS score after 3 months                                        |
